# Supplementary material
Source: publisher figshare collection journal article supplement (https://gsajournals.figshare.com/ndownloader/files/15139676)
Supplement: Supplementary file 1 [file 15139676]

## Ben Stewart-Brown
## 6/1/2018

## R code for "Genomic selection for yield and seed composition traits within an applied soybean breeding program"
## Authors: Benjamin B. Stewart-Brown, Qijian Song, Justin N. Vaughn, and Zenglu Li

# This R code is representative of the R code used for the completion of the genomic selection analysis portion of this manuscript. For true replication of
# the analysis, one would need to subset phenotypic and genotypic data files in the appropriate manner to indicate which populations are to be used as 
# training set and validation set for each genomic selection method (i.e., entire genomic selection dataset (EGSD), across population (AP), and within
# population (WP)). I have indicated in ALL CAPS files which will need to be referenced and manipulated by the user in order to replicate results. Numeric
# values were included below as examples (e.g., validation_size, training_size, iterations), but these would need to be modified depening on the desired
# method and parameters from the manuscript.

# Install rrBLUP
install.packages("rrBLUP")

# Load rrBLUP
library(rrBLUP) 

# Load phenotypic data
# The "phenotypic_data" file included all BLUPs calculated for each RIL for each trait. Load the specific worksheet corresponding to the phenotypic trait
# of interest. 
phenotype <- as.matrix(read.table(file = "PHENOTYPIC DATA"), header = TRUE)
dim(phenotype)

# Load genotypic data
# The "genotypic_data" file included all genotypic data for each RIL. Yield and protein/oil had separate genotypic datasets because the population sizes
# were different for these traits. Each marker subset (all, tag, 1/2 tag, 1/4 tag, 1/8 tag) has its own worksheet for each trait. All headers have been 
# removed from individual worksheets in order to complete analysis using rrBLUP. The desired worksheet should be imported here.
genotype <- as.matrix(read.table(file = "GENOTYPIC DATA"), header =  FALSE)
dim(genotype)

# Impute missing genotype information
impute <- A.mat(genotype,impute.method = "mean",return.imputed = T)

# Replace genotype file with imputed genotype file
genotype_impute <- impute$imputed
head(genotype_impute)
dim(genotype_impute)

# Indicate size of entire genomic selection dataset
dataset_size <- 483

# Indicate size of validation set
validation_size <- 20 # size of validation set
  
# Indicate sizes of training set you wish to test
training_size <- cbind(50,100,150,200,250,300)

# Indicate number of iterations to replicate genomic selection procedure
iterations <- 100 # number of iterations

# Set number of phenotypic traits investigated currently
traits <- 1

# Create matrices to store information from each iteration of the different training set and validation set for a trait of interest
ability <- matrix(nrow=iterations, ncol=traits)
ability_means <- matrix(nrow=length(training_size),ncol=1) # matrix of mean predictive abilities for each training set size
ability_iterations <- matrix(nrow=iterations,ncol=length(training_size)) # matrix of predictive abilities for each iteration of each training set size
predicted_name <- matrix(data=list(),nrow=iterations,ncol=length(training_size)) # matrix of names of validation lines for each iterations of each training set size
predicted_value <- matrix(data=list(),nrow=iterations,ncol=length(training_size)) # matrix of predicted values of validation lines for each iteration of each training set size
observed_value <- matrix(data=list(),nrow=iterations,ncol=length(training_size)) # matrix of observed values of validation lines for each iteration of each training set size
training_name <- matrix(data=list(),nrow=iterations,ncol=length(training_size)) # matrix of training set lines for each iteration

#### Run a loop through each iteration of each training set/validation set combination

# Set initial training set size count to zero
Tcount<-0 

# Cycle through training set sizes by 1
for(t in training_size) 
{Tcount<-Tcount +1

# Loop through iterations
for(r in 1:iterations)
{
  # Randomly sample the required training set size (t) from dataset
  # We are performing cross validation by randomly sampling the training set lines from the dataset and 
  # then randomly sampling the validation set from the remaining lines
  training_set <- as.matrix(sample(1:dataset_size,t))
  
  # Establish validation set from the remaining lines
  validation_set_all <- setdiff(1:dataset_size,training_set)
  validation_set <- sample(validation_set_all,validation_size)
  
  # Withdraw phenotypic and genotypic values for training set lines
  phenotype_training <- phenotype[training_set,]
  genotype_training <- genotype_impute[training_set,]
  
  # Withdraw phenotypic and genotypic values for validation set lines
  phenotype_validation <- phenotype[validation_set,]
  genotype_validation <- genotype_impute[validation_set,]
  
  # Indicate column from phenotype file with column corresponding to trait of interest for training set
  training_values <- (phenotype_training[,1])
  
  # Run mixed.solve to calculate allele effects based on established training set
  allele_effects_mixed <- mixed.solve(training_values, Z=genotype_training, X=NULL, K=NULL, SE = FALSE, return.Hinv=FALSE)
  allele_effects_u <- allele_effects_mixed$u
  allele_effects_matrix <- as.matrix(allele_effects_u)
  
  # Multiply genotype matrix of validation set with allele effects matrix to calculate genomic estimated breeding values for validation set
  predicted_validation <- genotype_validation %*% allele_effects_matrix
  
  # Indicate column from phenotype file with column corresponding to trait of interest for validation set
  validation_values <- (phenotype_validation[,1])
  
  # Store predictive ability values as correlation between predicted and observed value of validation set for each iteration
  ability[r,1] <- cor(predicted_validation, validation_values, use = "complete")
  
  # Store predictive ability values for each iteration
  ability_iterations[r,Tcount] <- cor(predicted_validation, validation_values, use = "complete")
  
  # Store validation set names for each iteration
  predicted_name[[r,Tcount]] <- validation_set
  
  # Store validation set predicted values for each iteration
  predicted_value[[r,Tcount]] <- predicted_validation
  
  # Store validation set observed values for each iteration
  observed_value[[r,Tcount]] <- validation_values
  
  # Store training set names for each iteration
  training_name[[r,Tcount]] <- training_set
  
}

# Store predicitive ability means across all iterations
ability_means[Tcount,1] <- mean(ability)
print(ability_means)
print(ability_iterations)

}

# Export ability_means as .csv file
write.csv(ability_means,"ability_means.csv")

# Export ability_iterations as .csv file
write.csv(ability_iterations,"ability_iterations.csv")

# Export predicted_name as .csv file
predicted_name_unlist <- lapply(predicted_name,unlist)
write.csv(predicted_name_unlist,"predicted_name.csv")

# Export predicted_value as .csv file
predicted_value_unlist <- lapply(predicted_value,unlist)
write.csv(predicted_value_unlist,"predicted_value.csv")

# Export observed_value as .csv file
observed_value_unlist <- lapply(observed_value,unlist)
write.csv(observed_value_unlist,"observed_value.csv")

# Export training_name as .csv file
write.csv(training_name,"training_name.csv")
